# Supplementary material for: Inhibition of Enhancer of Zeste Homolog 2 Induces Blast Differentiation, Impairs Engraftment and Prolongs Survival in Murine Models of Acute Myeloid Leukemia
Source: MDPI journal article supplement (doi:10.3390/cancers16030569), 2024-01-29

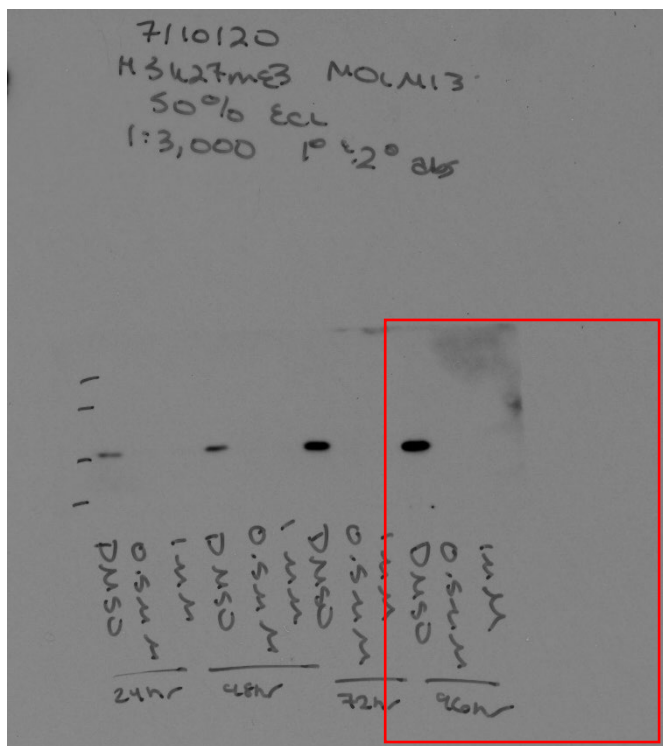

MOLM-13  
H3K27me3

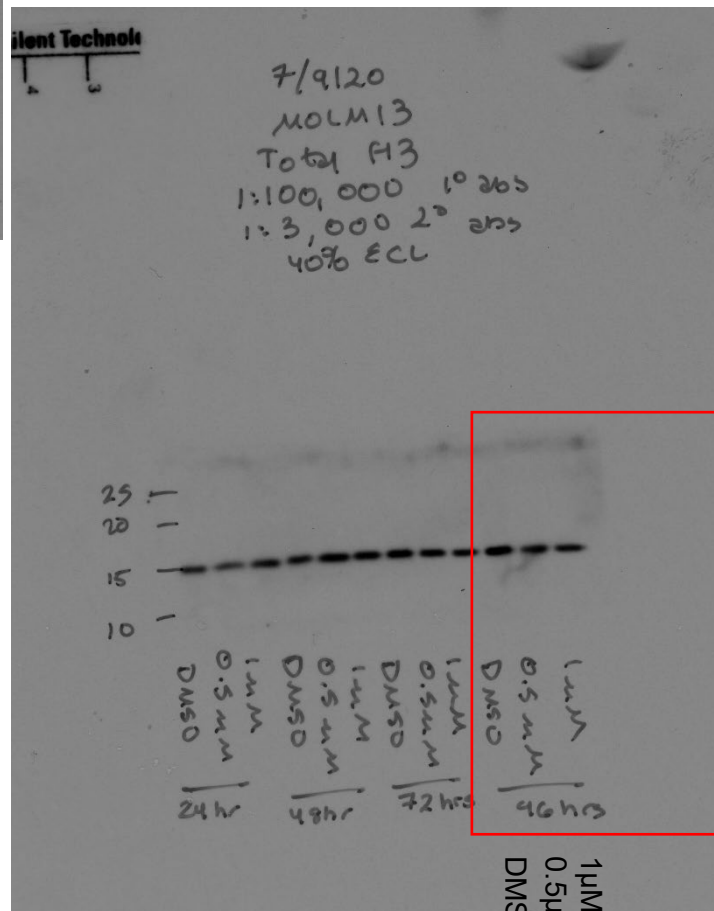

MOLM-13  
Total H3

1µM EPZ  
0.5µM EPZ  
DMSO

A.

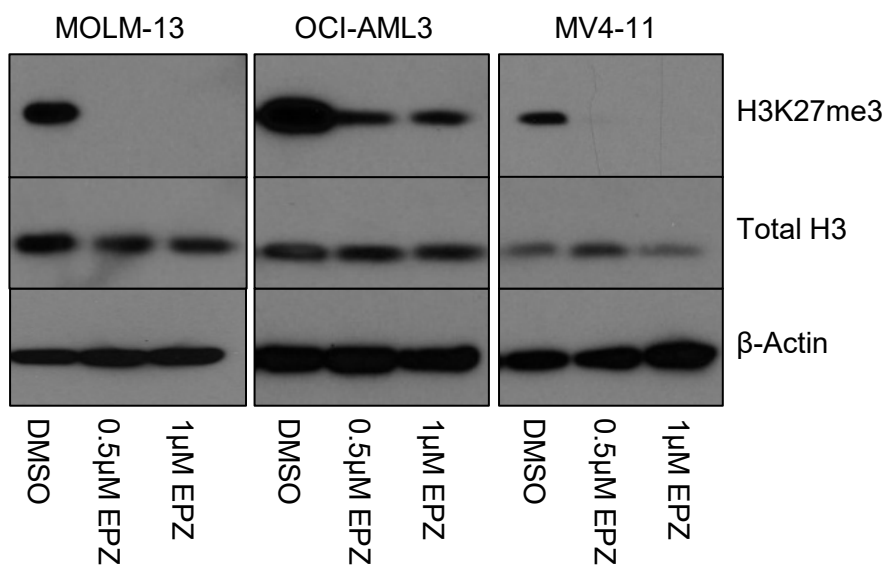

MOLM-13  
 $\beta$ -Actin

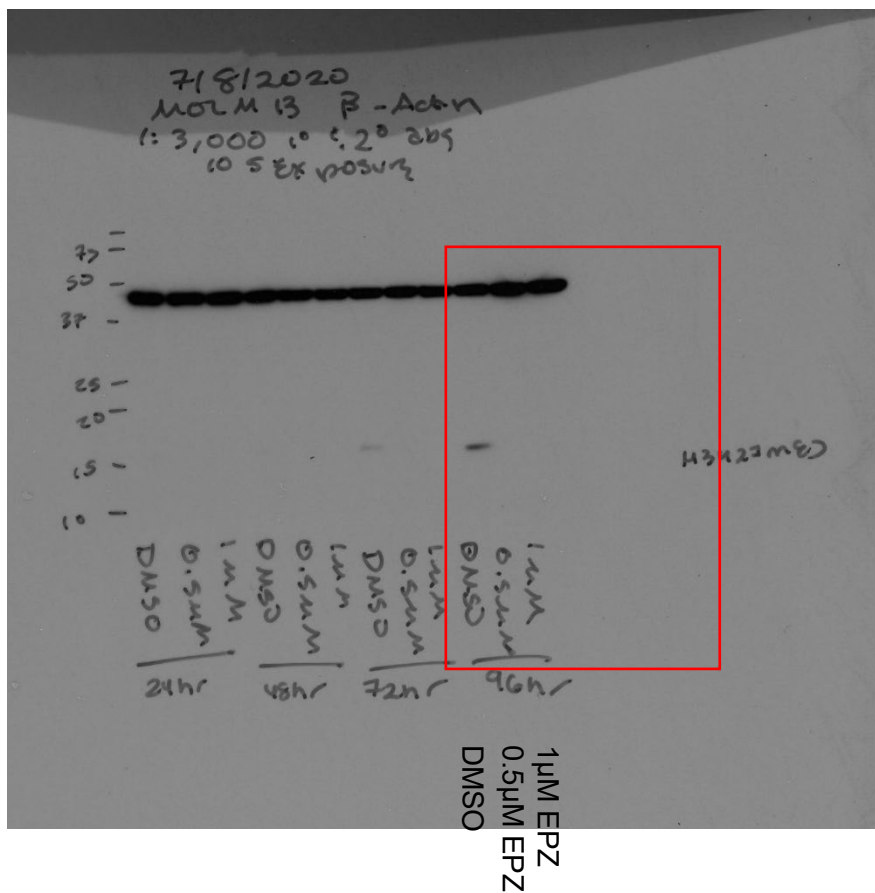

A.

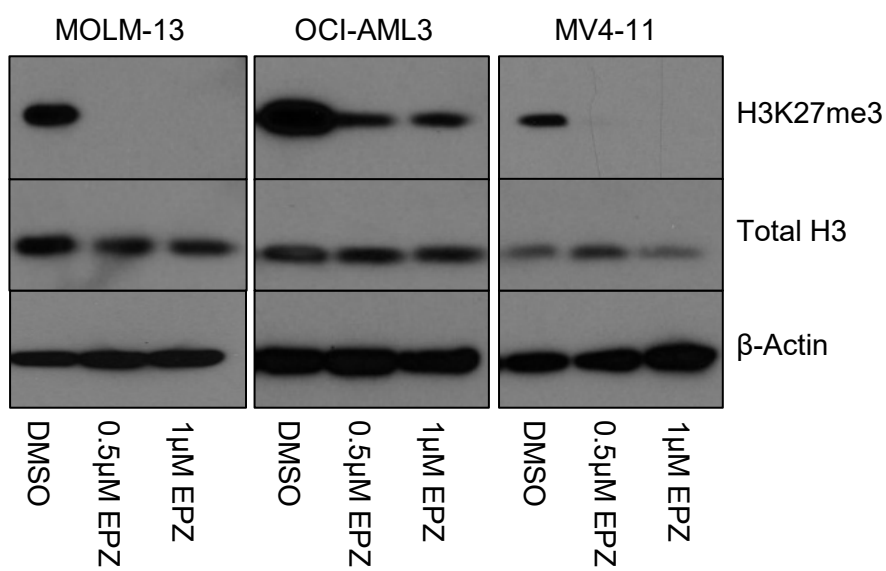

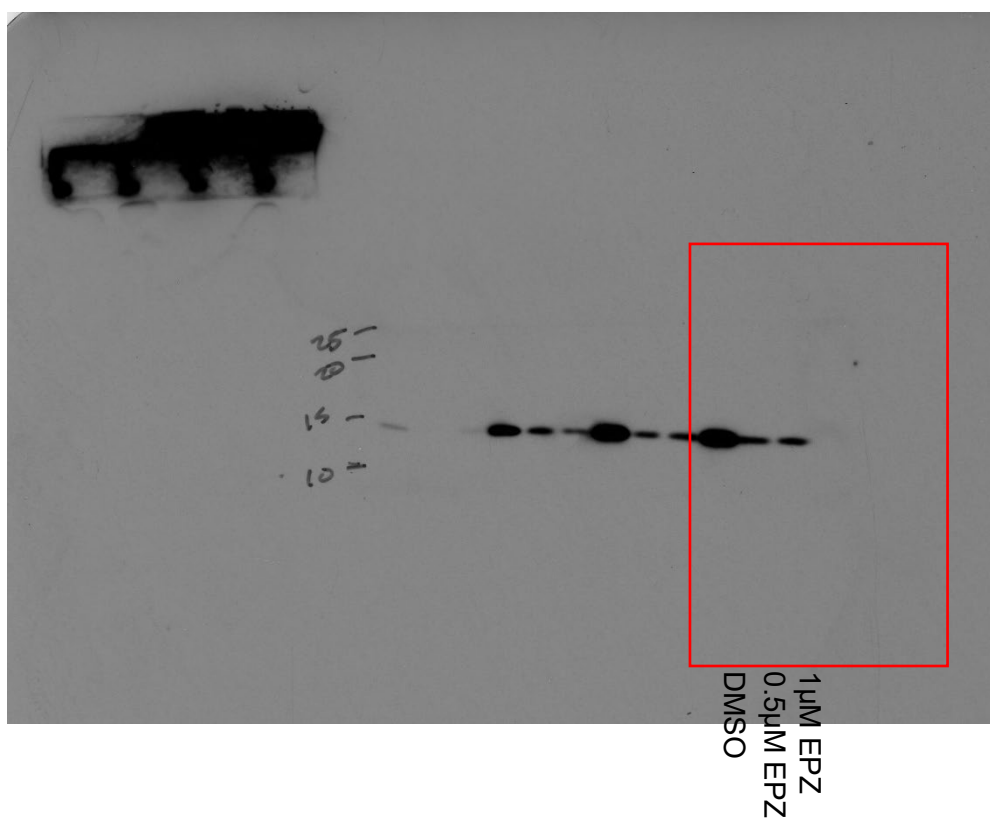

OCI-AML3  
H3K27me3

A.

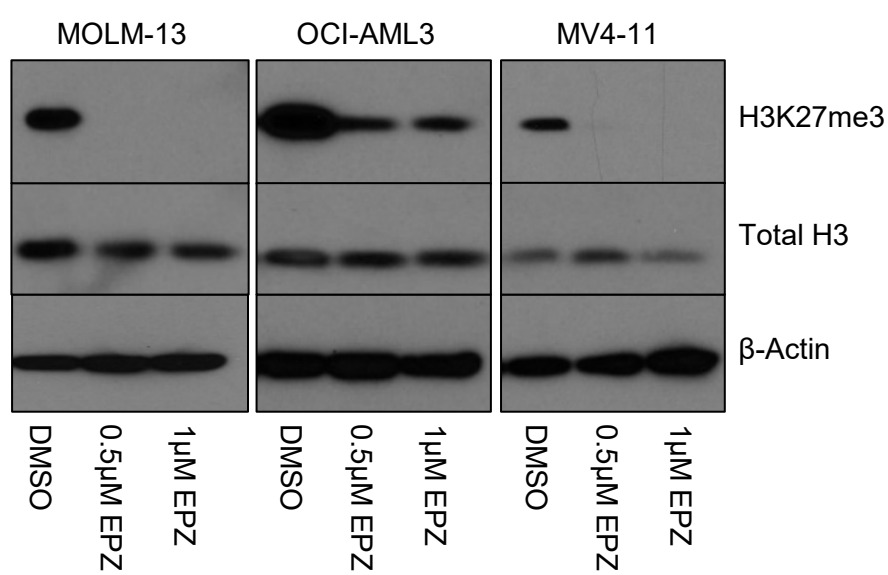

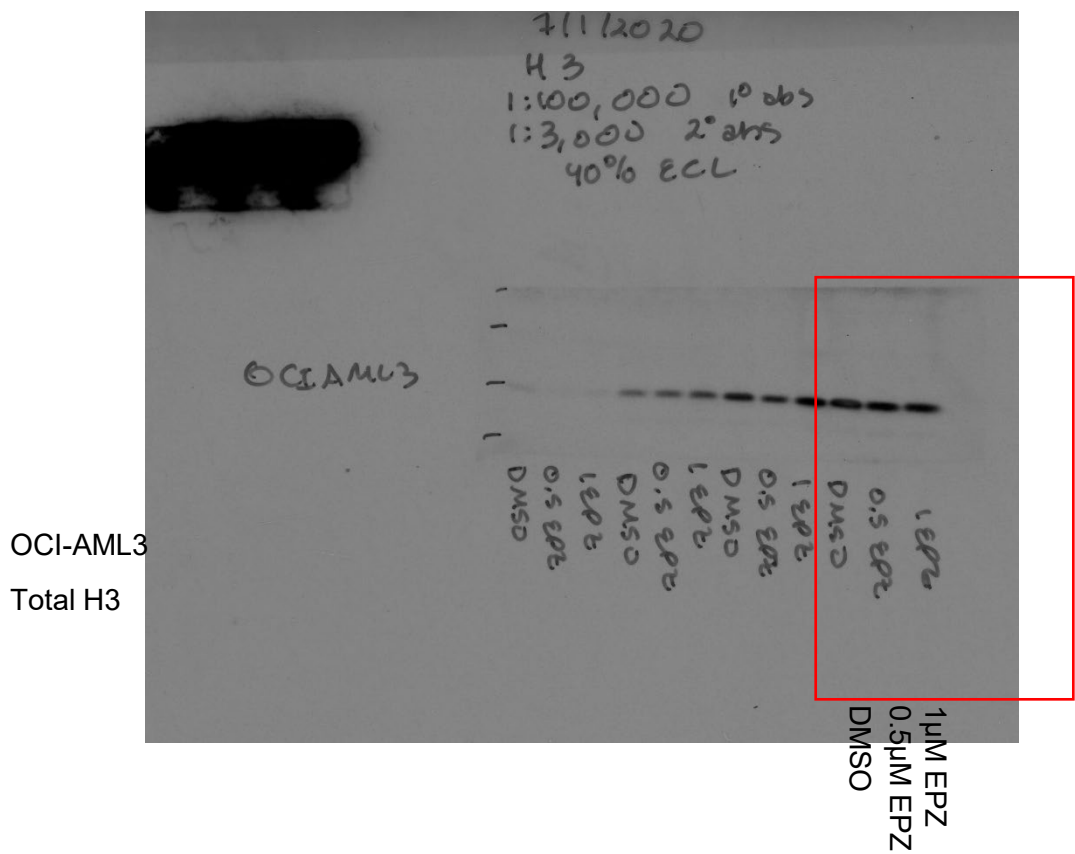

A.

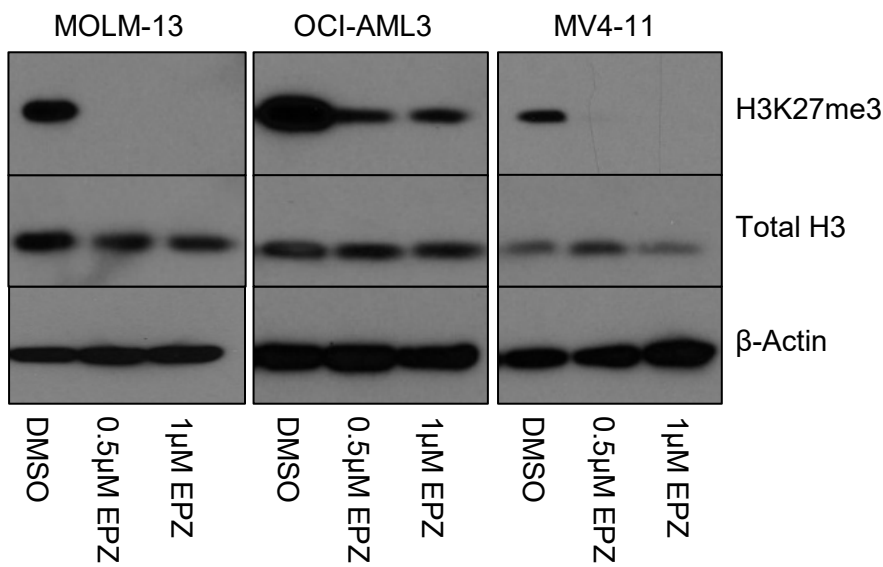

MV4-11  
H3K27me3

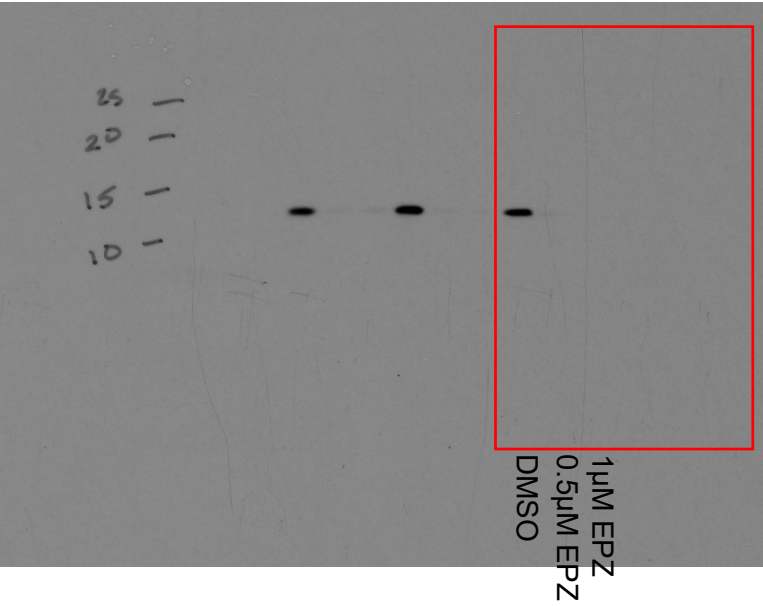

MV4-11  
Total H3

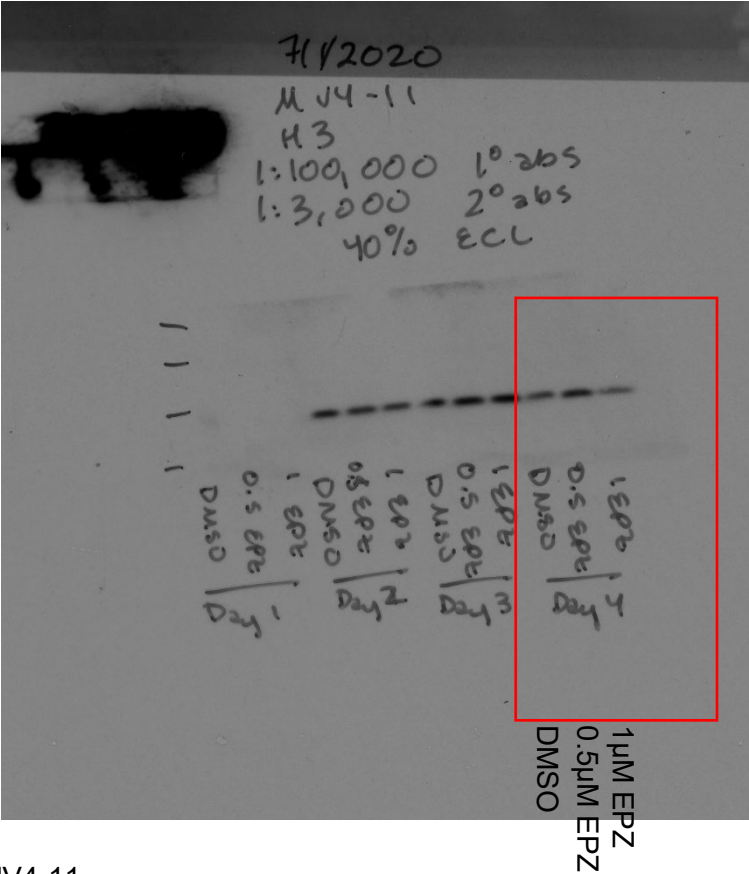

A.

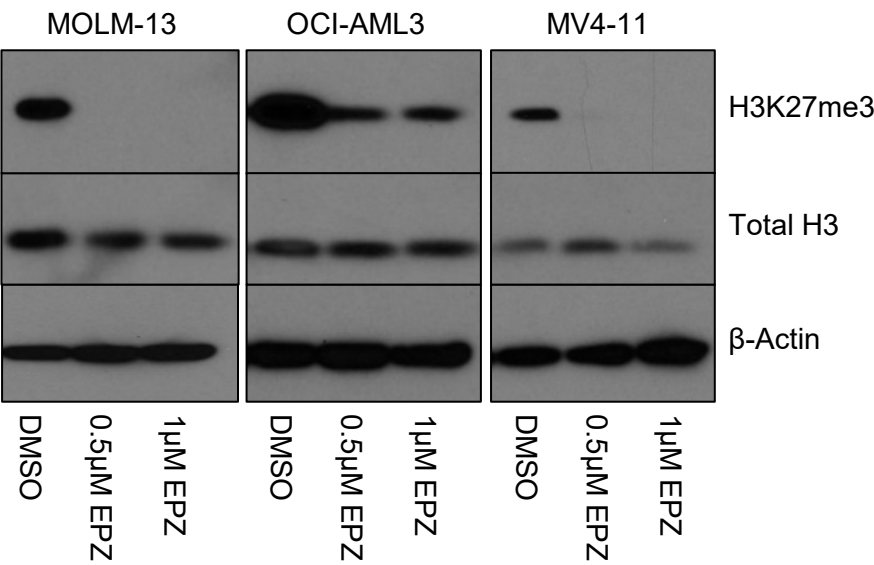

OCI-AML3  
β-Actin

MV4-11  
β-Actin

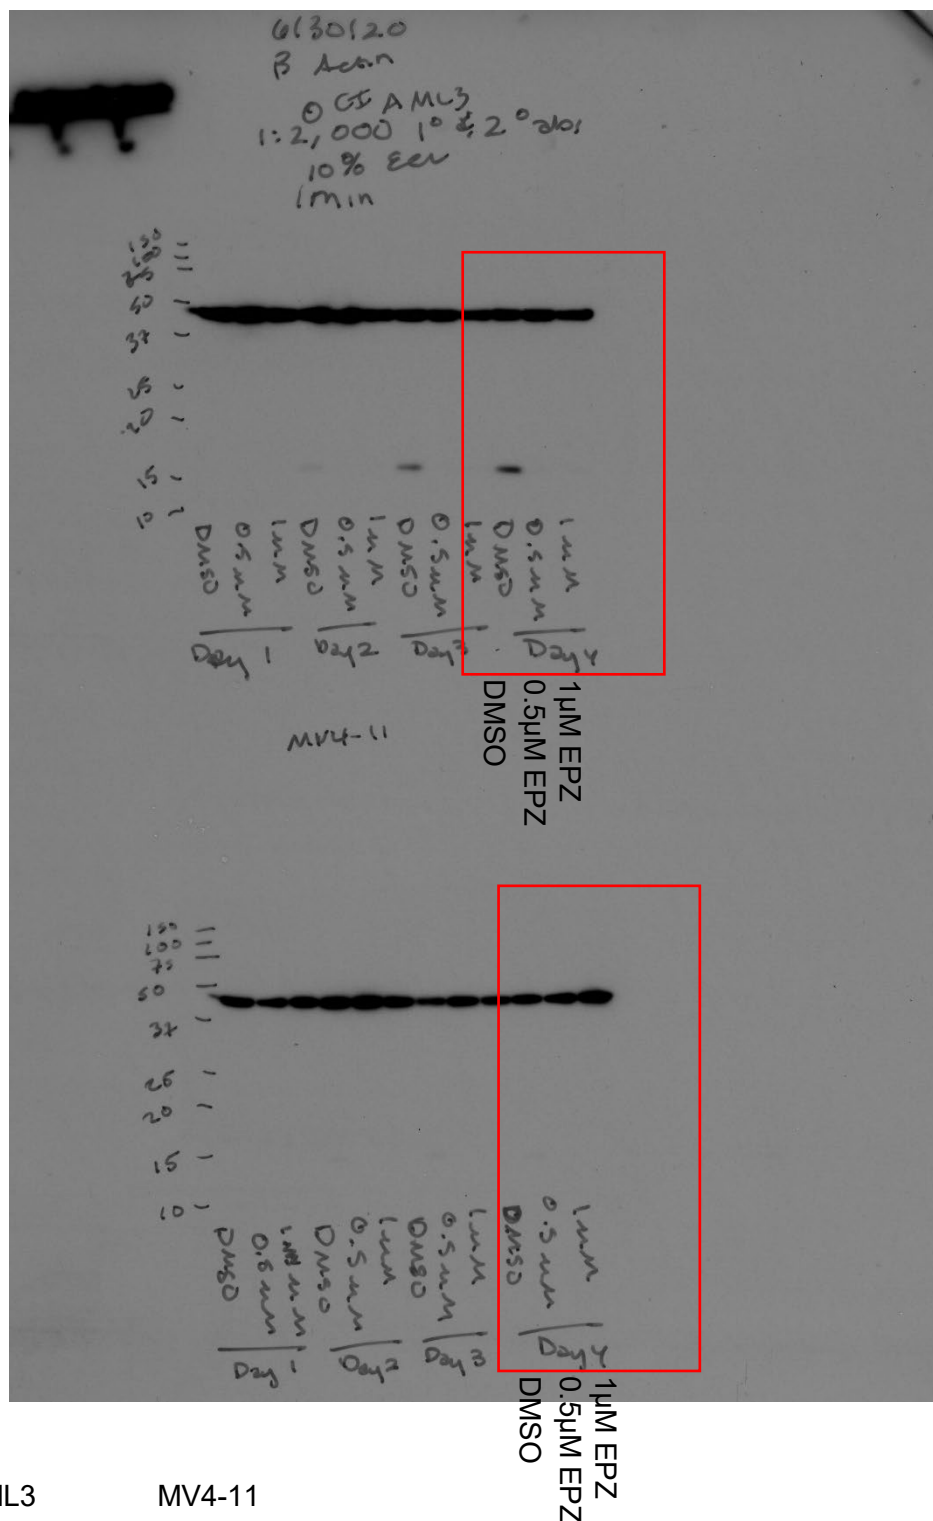

A.

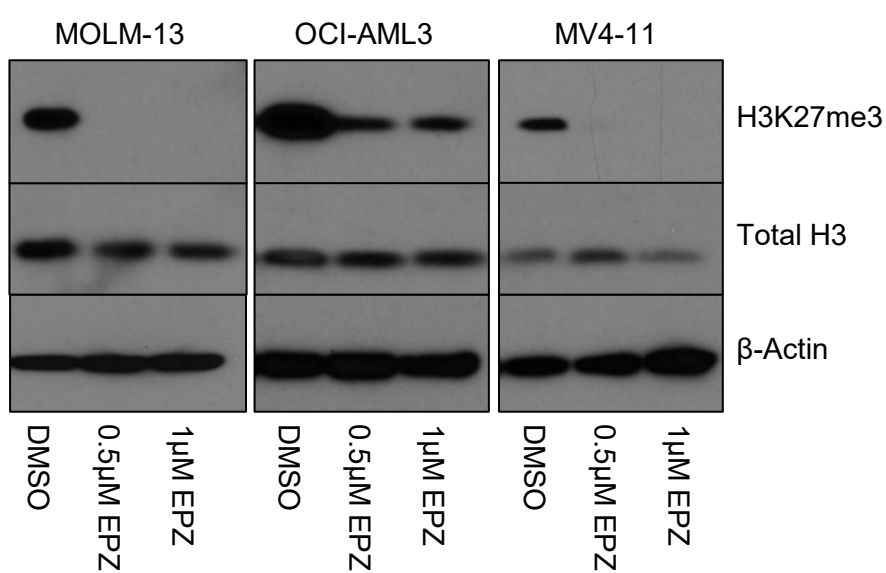

Supplement: s1 [file s1]
