# Supplementary material for: Inhibition of Enhancer of Zeste Homolog 2 Induces Blast Differentiation, Impairs Engraftment and Prolongs Survival in Murine Models of Acute Myeloid Leukemia
Source: MDPI journal article supplement (doi:10.3390/cancers16030569), 2024-01-29
Supplement: s1 [file s1]

**Supplemental Table S1: AML Patient Sample Characteristics**

| Unique ID | Sample source | Genetic mutations                                                       | Karyotype                                                                                                                                                                         |
|-----------|---------------|-------------------------------------------------------------------------|-----------------------------------------------------------------------------------------------------------------------------------------------------------------------------------|
| AML-1     | Blood         | ASXL / DNMT3A                                                           | 47,XX,+6,dmin[cp20].nuc ish(amp MYC+)                                                                                                                                             |
| AML-2     |               | IDH2 R140Q                                                              | 46,XY[20]                                                                                                                                                                         |
| AML-3     | Apheresis     | Philadelphia + / BCR-ABL                                                | 48,XX,+8,t(9;22)(q34;q11.2),+der(22)t(9;22)(q34;q11.2)[20]                                                                                                                        |
| AML-4     | Apheresis     | None Detected                                                           | 46,XY,inv(16)(p13.1q22)[14]/46,XY[5]/nonclonal with clonal abnormalities[1]                                                                                                       |
| AML-5     | Blood         | TP53 / DNMT3A                                                           | 45,XX,add(3)(p21),add(4)(q21),del(5)(q15q35),-9,der(11)(pter->q23::q21->q23::q13->qter),del(12)(p11.2),-13,-13,-15,-19,+mar1,+mar2,+mar3,+mar4[13,two w/nonclonal abnormalities]/ |
| AML-6     | Apheresis     | TET2 T229fs / NPM1 W288fs / FLT3-ITD E596                               | 46,XX[20]                                                                                                                                                                         |
| AML-7     | Bone marrow   | CDKN2A/B loss of p16INK4a and p14ARF exon 1 / loss of CDKN2B            | complex karyotype                                                                                                                                                                 |
| AML-8     | Bone marrow   | UNK                                                                     | UNK                                                                                                                                                                               |
| AML-9     | Bone marrow   | None Detected                                                           | 46,XX[20]                                                                                                                                                                         |
| AML-10    | Bone marrow   | None Detected                                                           | 47,XY,t(1;11)(p32;q23),+19[20]                                                                                                                                                    |
| AML-11    | Bone marrow   | None Detected                                                           | 46,XY,t(5;20)(q15;q13.1),add(19)(p13.3),add(19)(p13.3)(cp9)/46,idem,del(9)(                                                                                                       |
| AML-12    | Apheresis     | KMT2A (MLL) rearrangement / FLT3-JMD                                    | 46,XY,t(6;11)(q27;q23)[19]/nonclonal[1]                                                                                                                                           |
| AML-13    | Bone marrow   | None Detected                                                           | 46,XY,t(12;22)(p13;q11.2)[6]/46,sl,t(X;13)(q13;q12)[4]/47,sdl1,+8[10].ish t(12;22)(3' ETV6+;5' ETV6+)                                                                             |
| AML-14    | Apheresis     | NPM1 / BCR-ABL                                                          | 46,XY,t(9;22)(q34;q11.2)[18]/nonclonal w/clonal[2]                                                                                                                                |
| AML-15    | Bone marrow   | FLT3-ITD                                                                | 46,XX[20]                                                                                                                                                                         |
| AML-16    | Blood         | IDH1 / JAK2                                                             | 46,XY[20]                                                                                                                                                                         |
| AML-17    | Apheresis     |                                                                         | 46,XY,inv(16)(p13q22)[14]/46,XY[4]/nonclonal w/clonal abnormality[2]                                                                                                              |
| AML-18    | Apheresis     | FLT3-ITD F605 / NPM1 W288fs / NRAS G12D/ RAD21 G547 / WT1 A382 / PTPN11 | 46,XY[20]                                                                                                                                                                         |
| AML-19    | Apheresis     | NPM1                                                                    | Insufficient Metaphases (46,XX[1])                                                                                                                                                |
| AML-20    | Bone marrow   | NPM1                                                                    | 46,XY,del(7)(p15)[20]                                                                                                                                                             |
| AML-21    | Apheresis     | FLT3-ITD                                                                | 46,XY[20]                                                                                                                                                                         |
| AML-22    | Apheresis     | GATA2 / NPM1 / FLT3-ITD                                                 | 46,XX[19]/nonclonal[1]                                                                                                                                                            |
| AML-23    | Blood         | IDH1 R132H / NPM1 W288 / PTPN11 N58Y / DNMT3A R882 / PTPN11 S502L       | 46,XY[19]/nonclonal[1]                                                                                                                                                            |
| AML-24    | Apheresis     | FLT3-ITD / IDH2 R140Q / DNMT3A R882H                                    | 46,XX[19]/nonclonal[1]                                                                                                                                                            |

**Supplemental Table S1: AML Patient Sample Characteristics (Cont'd)**

| Unique ID | Sample source | Genetic mutations                                                                                                                        | Karyotype                                           |
|-----------|---------------|------------------------------------------------------------------------------------------------------------------------------------------|-----------------------------------------------------|
| AML-25    | Bone marrow   | None Detected                                                                                                                            | 46,XX,t(1;19)(p36.1;p13.3)?c,t(9;22)(q34;q11.2)[20] |
| AML-26    | Apheresis     | NPM1 / DNMT3A / IDH2 / NRAS                                                                                                              | 46,XX[20]                                           |
| AML-27    | Blood         |                                                                                                                                          | 46,XY,t(15;17)(q24;q21)[10]                         |
| AML-28    | Blood         | CEBPA / JAK2 / WT1 R250P / WT C244 / TET2                                                                                                | 46,XX[20]                                           |
| AML-29    | Bone marrow   | NF1 Q1775* / PTPN11 A461G (subclonal) / CDKN2A/B loss / ETV6 loss / PICALM-MLLT10 fusion / PHF6 R274Q / TP53 K164E (subclonal) and Y126* | complex karyotype                                   |
