# Supplementary figures and images for: Inhibition of Enhancer of Zeste Homolog 2 Induces Blast Differentiation, Impairs Engraftment and Prolongs Survival in Murine Models of Acute Myeloid Leukemia
Source: MDPI journal article supplement (doi:10.3390/cancers16030569), 2024-01-29

AML-25

DMSO

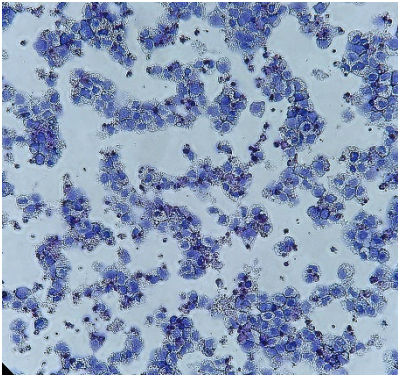

1 $\mu$ M EPZ

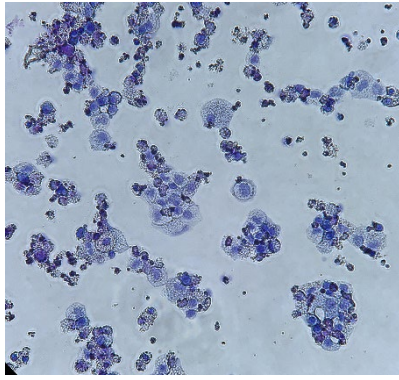

AML-27

DMSO

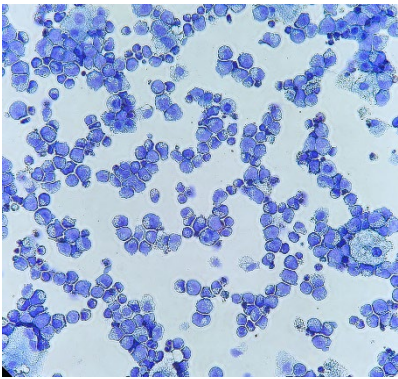

1 $\mu$ M EPZ

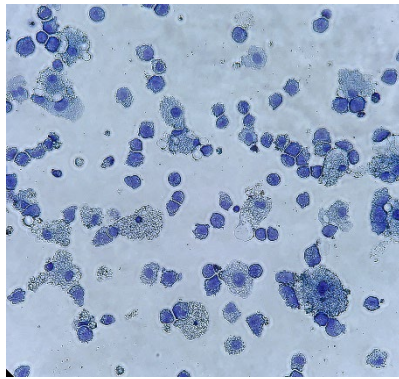

AML-1

DMSO

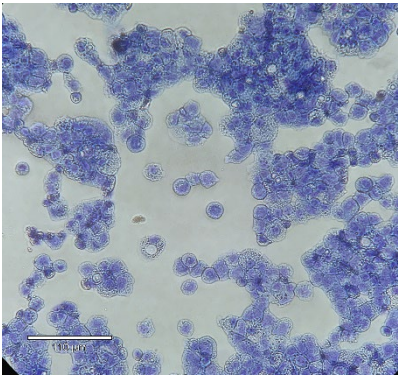

1 $\mu$ M EPZ

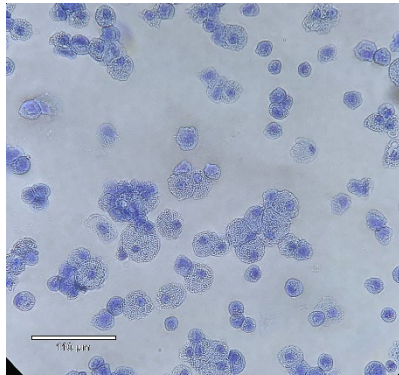

Supplement: s1 [file s1]

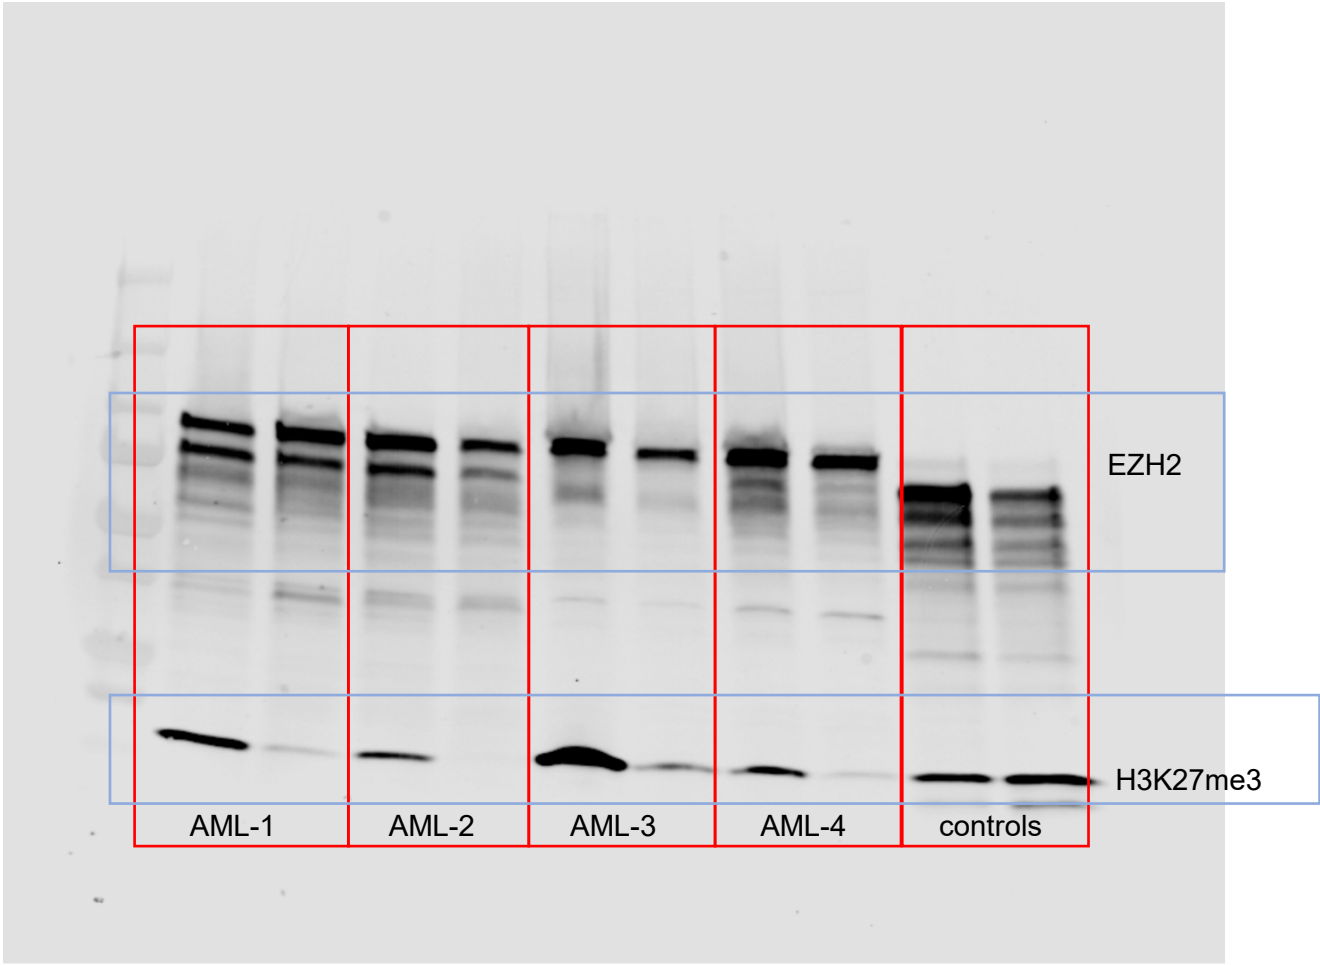

A.

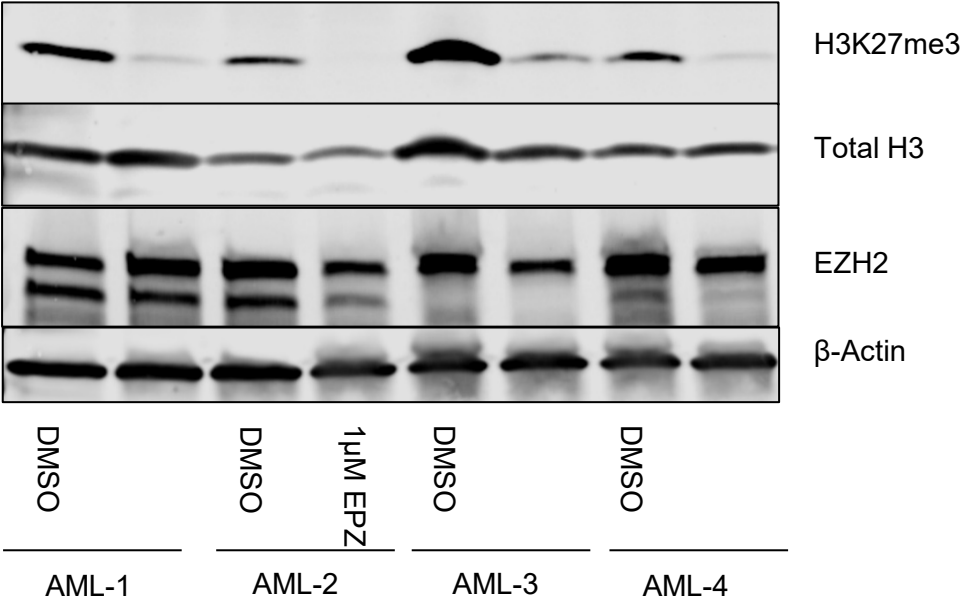

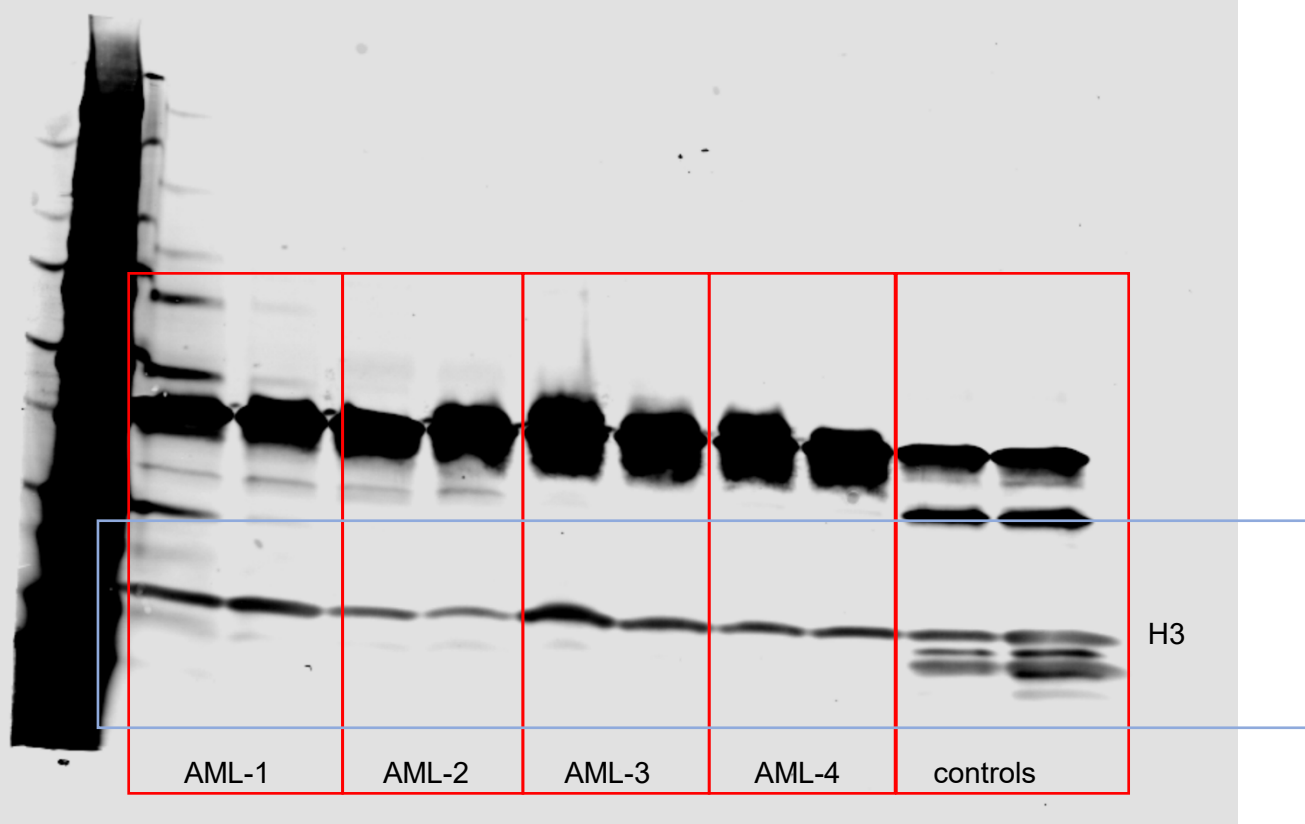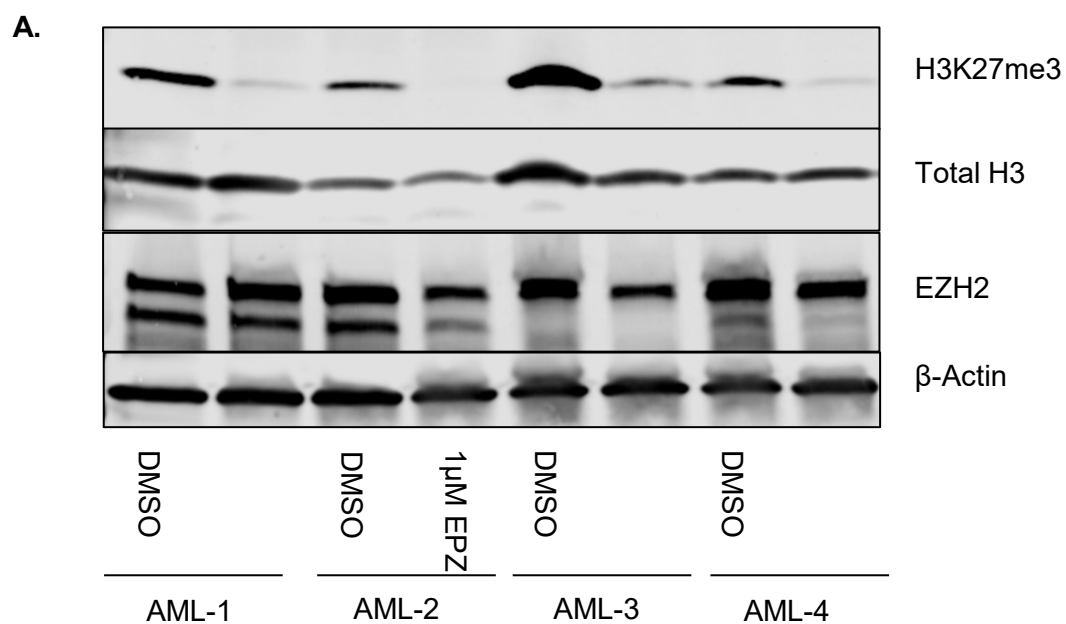

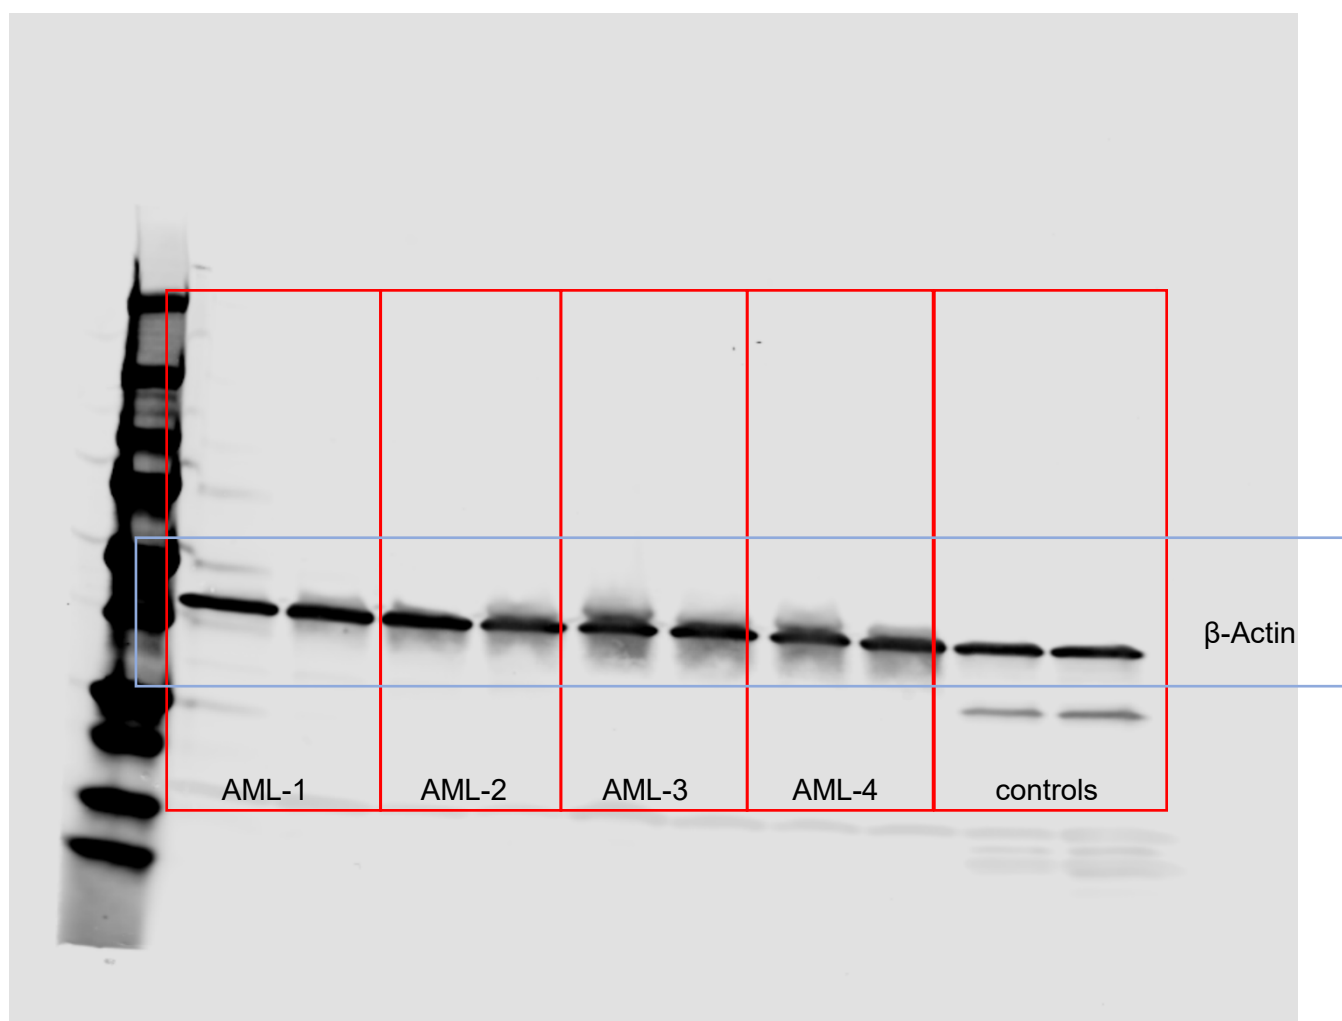

A.

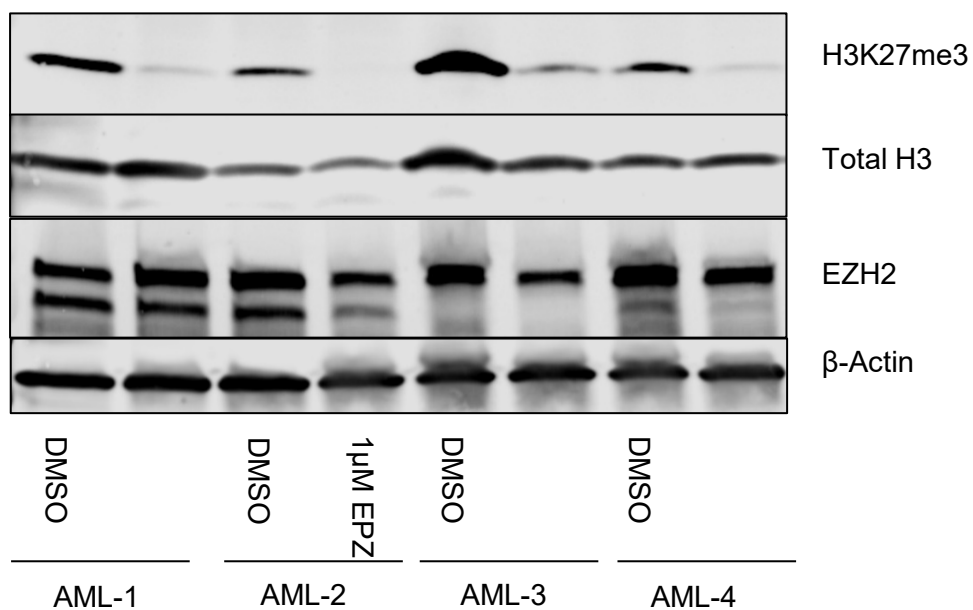

Supplement: s1 [file s1]

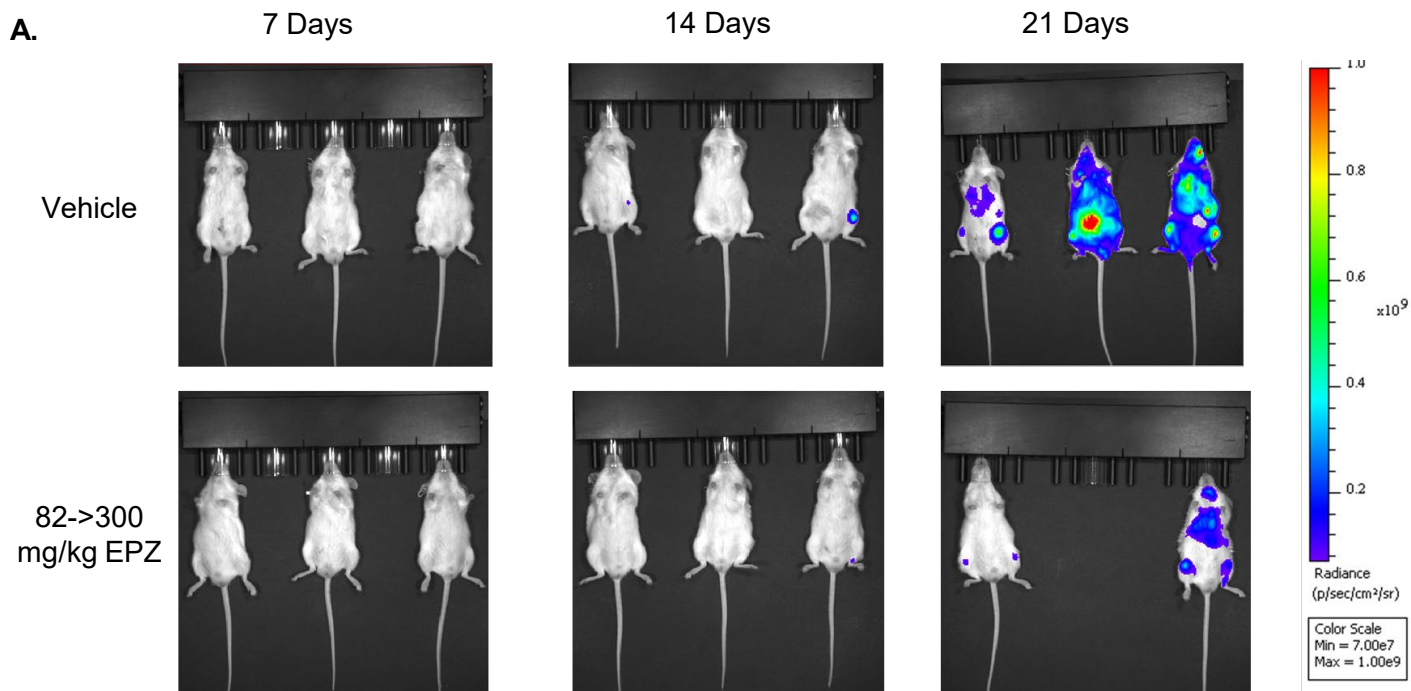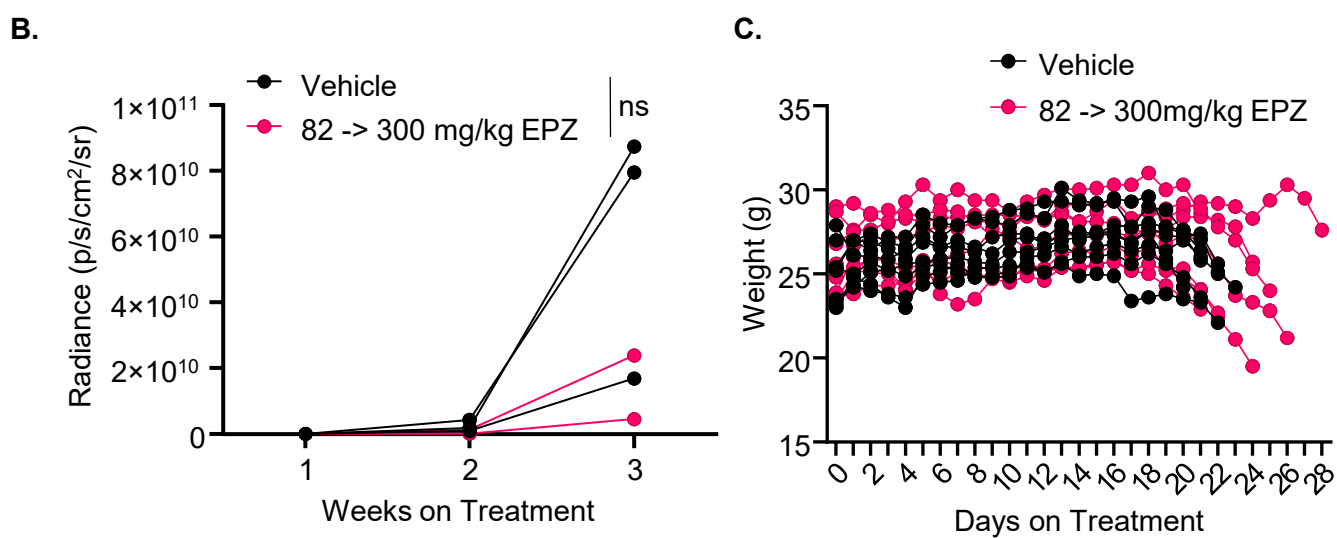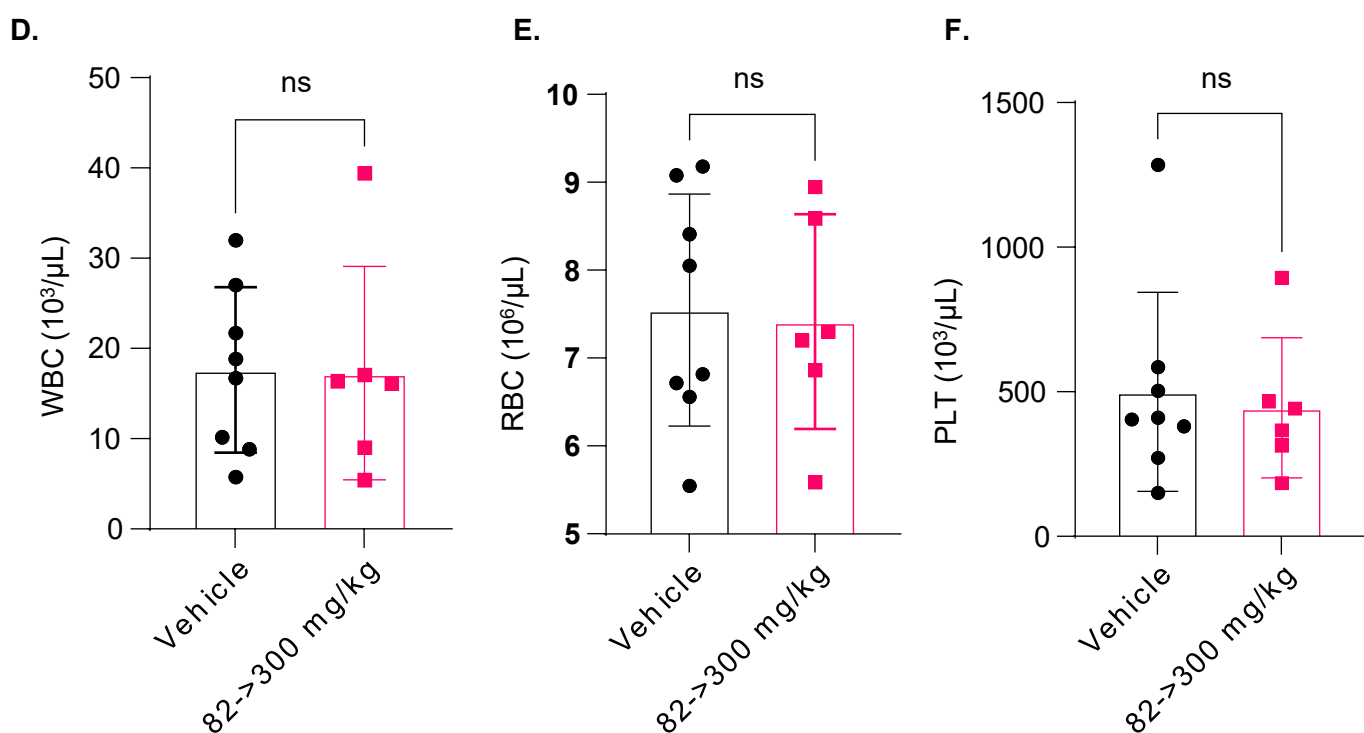

Supplement: s1 [file s1]

**A.**

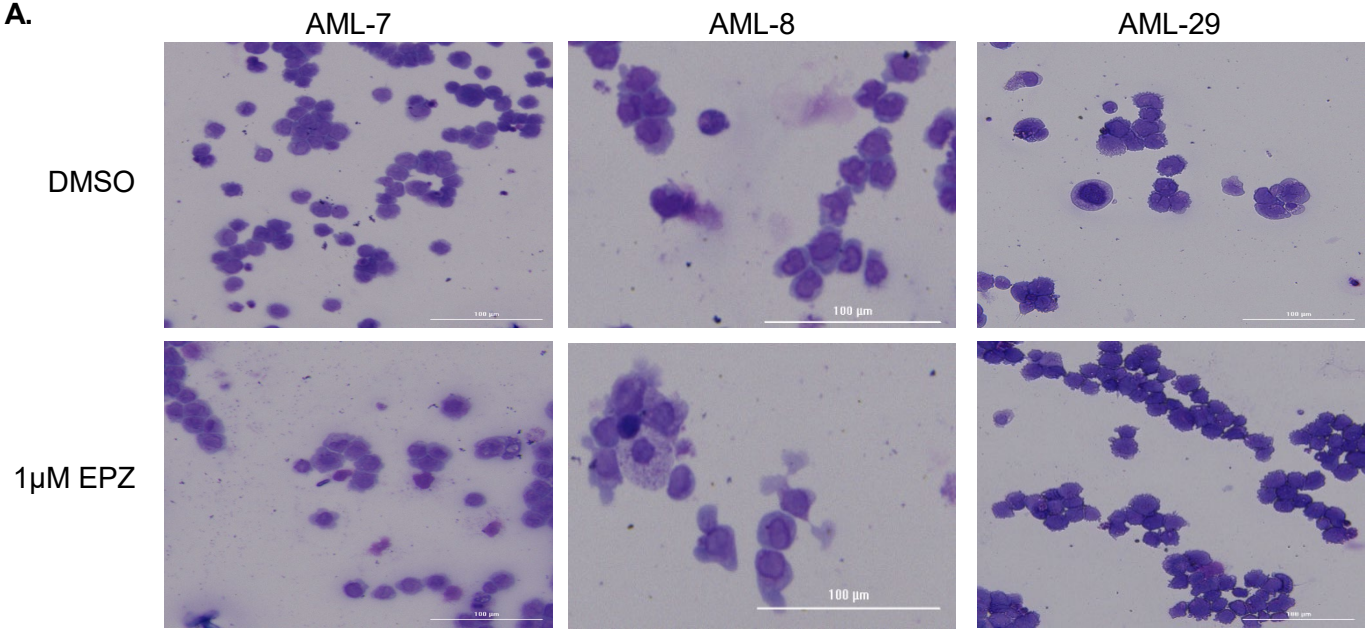

**B.**

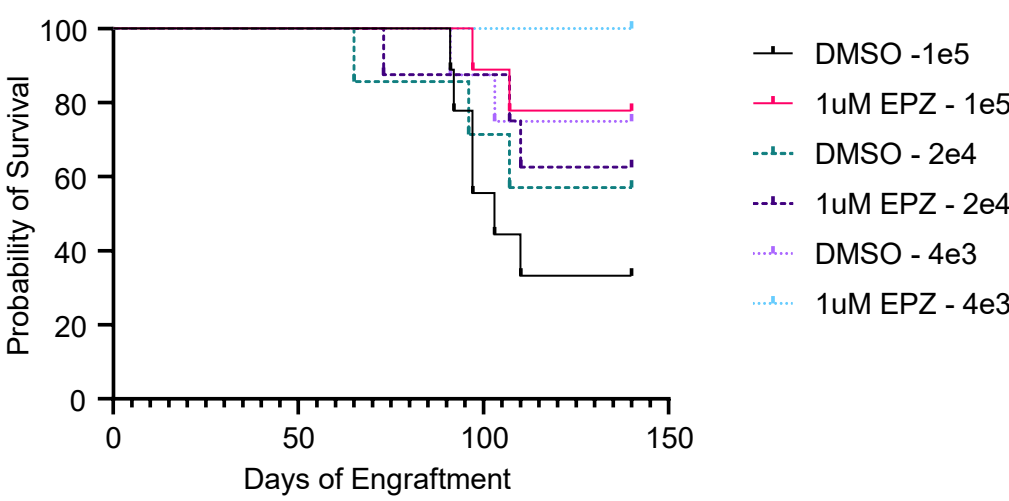

Supplement: s1 [file s1]

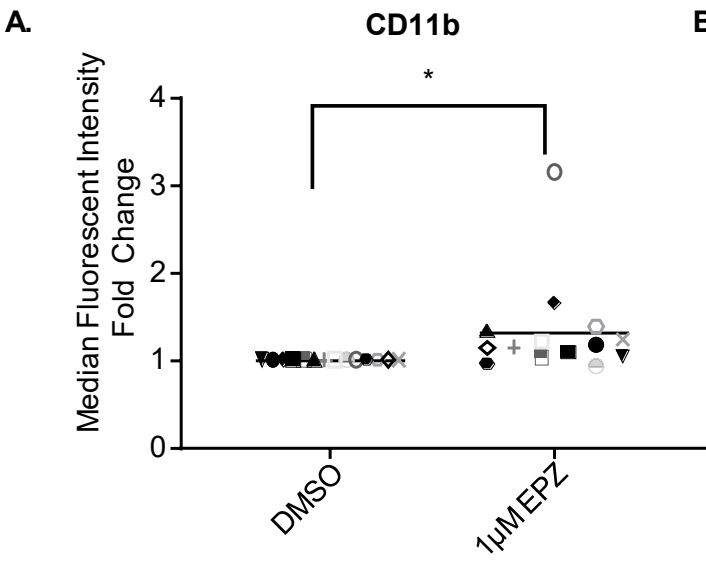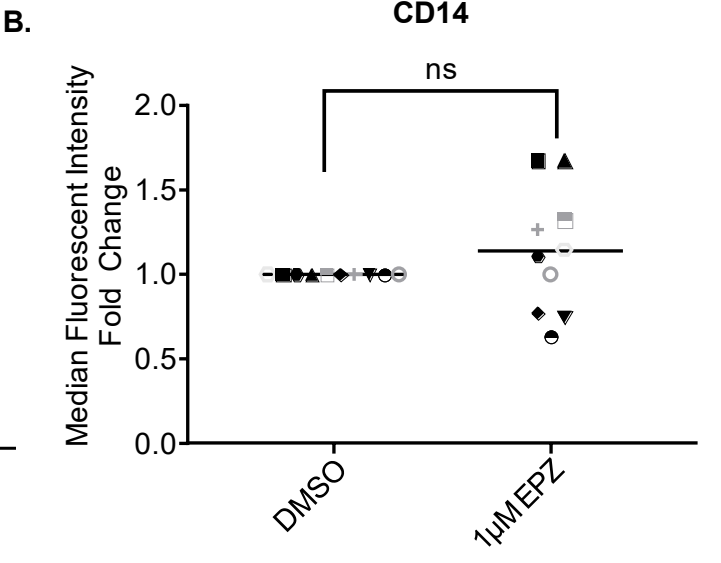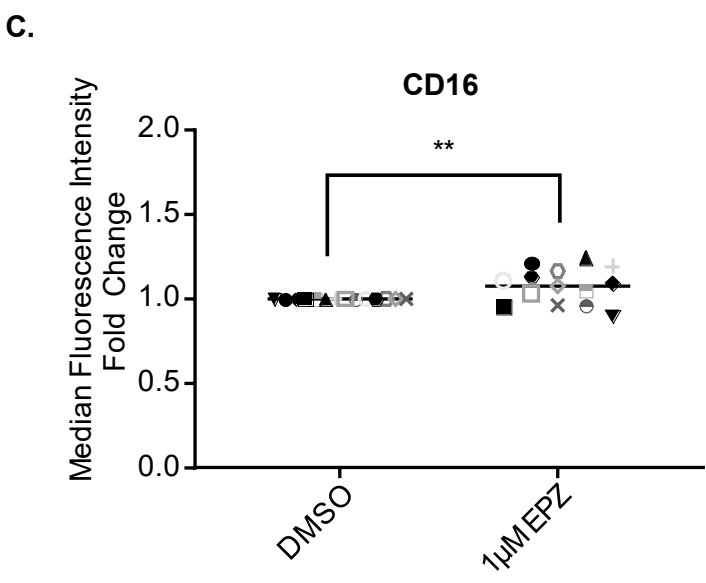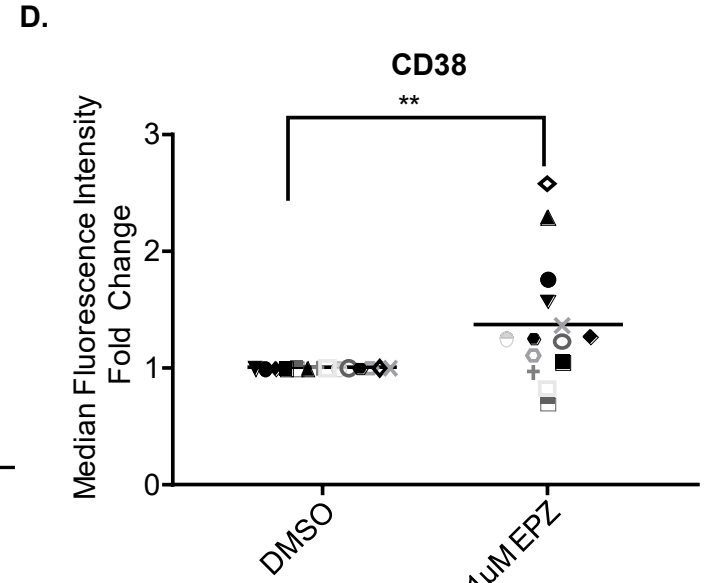

Supplement: s1 [file s1]
